# Supplementary material
Source: Royal Society of Chemistry journal article supplement (doi:10.1039/d6dt00679e)
Supplement: d6dt00679e1.pdf [file d6dt00679e1.pdf]

## Supporting Information

### Metal Cation Effects on the Structural, Optical and Thermal Properties of the Double Tungstates $AM(WO_4)_2$ (A = Li, Na, K; M = Y, La, Ce, Pr, Nd, Sm, Bi)

Authors: V. Wessels,<sup>[a]</sup> M. Hämmer,<sup>[a]</sup> F. Becker,<sup>[a]</sup> A. Sandner,<sup>[a]</sup> N. S. Kaur<sup>[a]</sup> and H. A. Höppe\*<sup>[a]</sup>

<sup>[a]</sup> Professur für Festkörperchemie und Materialwissenschaften, Institute of Physics, Universität Augsburg, Universitätsstraße 1, 86159 Augsburg, Germany

### Table of Contents

|                                             |    |
|---------------------------------------------|----|
| Crystal Data and Structure Refinements..... | 2  |
| Powder X-ray Diffraction Patterns.....      | 10 |
| UV-Vis and Photoluminescence Spectra.....   | 13 |
| Thermal Analysis.....                       | 14 |
| Selected Ionic Radii after Shannon .....    | 16 |
| MAPLE Calculations .....                    | 17 |
| References .....                            | 18 |

## Crystal Data and Structure Refinements

**Table S1.** Crystal data and details of the structural refinements of selected double tungstates  $\beta$ -LiLa(WO<sub>4</sub>)<sub>2</sub>,  $\alpha$ -LiPr(WO<sub>4</sub>)<sub>2</sub>,  $\alpha$ -LiY(WO<sub>4</sub>)<sub>2</sub>, and NaY(WO<sub>4</sub>)<sub>2</sub> with single-crystal data reported for the first time, determined by single-crystal X-ray diffraction. Standard deviations are given in parentheses

|                                                                          | $\beta$ -LiLa(WO <sub>4</sub> ) <sub>2</sub> | $\alpha$ -LiPr(WO <sub>4</sub> ) <sub>2</sub> | $\alpha$ -LiY(WO <sub>4</sub> ) <sub>2</sub> | NaY(WO <sub>4</sub> ) <sub>2</sub>       |
|--------------------------------------------------------------------------|----------------------------------------------|-----------------------------------------------|----------------------------------------------|------------------------------------------|
| Temperature / K                                                          | 298(2)                                       | 300(2)                                        | 300(2)                                       | 300(2)                                   |
| Molar weight / g·mol <sup>-1</sup>                                       | 641.55                                       | 643.55                                        | 599.55                                       | 607.60                                   |
| Crystal system                                                           | Tetragonal                                   | Triclinic                                     | Monoclinic                                   | Tetragonal                               |
| Space group                                                              | <i>I</i> <sub>4</sub> <i>/a</i> (no. 88)     | <i>P</i> $\bar{1}$ (no. 2)                    | <i>P</i> 2/ <i>n</i> (no. 13)                | <i>I</i> <sub>4</sub> <i>/a</i> (no. 88) |
| <i>a</i> / Å                                                             | 5.3352(3)                                    | 7.1028(1)                                     | 5.0038(1)                                    | 5.2090(2)                                |
| <i>b</i> / Å                                                             | 5.3352(3)                                    | 7.3561(1)                                     | 5.7993(2)                                    | 5.2090(2)                                |
| <i>c</i> / Å                                                             | 11.5736(8)                                   | 7.47920(1)                                    | 9.9959(3)                                    | 11.2930(5)                               |
| $\alpha$ / °                                                             | 90                                           | 114.356(1)                                    | 90                                           | 90                                       |
| $\beta$ / °                                                              | 90                                           | 115.555(1)                                    | 94.1853(3)                                   | 90                                       |
| $\gamma$ / °                                                             | 90                                           | 91.063(1)                                     | 90                                           | 90                                       |
| <i>V</i> / Å <sup>3</sup>                                                | 329.44(4)                                    | 311.86(1)                                     | 289.29(1)                                    | 306.42(3)                                |
| <i>Z</i>                                                                 | 2                                            | 2                                             | 2                                            | 2                                        |
| $\rho$ / g·mol <sup>-1</sup>                                             | 6.468                                        | 6.853                                         | 6.791                                        | 6.585                                    |
| Absorption coefficient<br>$\mu$ / mm <sup>-1</sup>                       | 41.199                                       | 44.482                                        | 49.612                                       | 46.913                                   |
| <i>F</i> (000)                                                           | 544                                          | 548                                           | 508                                          | 524                                      |
| Radiation; wavelength $\lambda$<br>/ Å                                   |                                              |                                               | 0.71073                                      |                                          |
| Diffractometer                                                           |                                              |                                               | Bruker D8 Venture                            |                                          |
| $\theta$ range / °                                                       | 4.206-29.724                                 | 3.131-32.494                                  | 3.513-27.976                                 | 4.309-32.404                             |
| Absorption correction                                                    |                                              |                                               | Multi-scan                                   |                                          |
| Transmission (min; max)                                                  | 0.5423; 0.7490                               | 0.4213; 0.7535                                | 0.3308; 0.7503                               | 0.6474; 0.7490                           |
| Index range <i>h</i>   <i>k</i>   <i>l</i>                               | -7/7   -7/7   -16/16                         | -10/10   -11/11   -11/11                      | -6/6   -7/7   -13/13                         | -7/7   -7/7   -16/16                     |
| Reflections collected                                                    | 1957                                         | 37481                                         | 6256                                         | 2828                                     |
| Independent reflections                                                  | 242                                          | 2224                                          | 706                                          | 276                                      |
| Obs. reflections                                                         | 241                                          | 2097                                          | 693                                          | 243                                      |
| Refined parameter                                                        | 16                                           | 110                                           | 57                                           | 16                                       |
| <i>R</i> <sub>int</sub>                                                  | 0.0281                                       | 0.0718                                        | 0.0339                                       | 0.0289                                   |
| <i>R</i> <sub>1</sub> (all data)                                         | 0.0515                                       | 0.0362                                        | 0.0134                                       | 0.0170                                   |
| <i>wR</i> <sub>2</sub>                                                   | 0.1262                                       | 0.0256                                        | 0.0313                                       | 0.0372                                   |
| GooF                                                                     | 1.747                                        | 1.123                                         | 1.209                                        | 1.202                                    |
| Residual electron density<br>(max; min) / e <sup>-</sup> Å <sup>-3</sup> | 2.946; -2.770                                | 1.536; -0.912                                 | 1.958; -0.925                                | 1.329; -0.920                            |
| CSD                                                                      | 2539263                                      | 2539264                                       | 2539265                                      | 2539266                                  |

**Table S2.** Crystal data and details of the structural refinements of selected double tungstates NaBi(WO<sub>4</sub>)<sub>2</sub>, KLa(WO<sub>4</sub>)<sub>2</sub>, KY(WO<sub>4</sub>)<sub>2</sub>, and KBi(WO<sub>4</sub>)<sub>2</sub> with single-crystal data reported for the first time, determined by single-crystal X-ray diffraction. Standard deviations are given in parentheses

|                                                             | NaBi(WO <sub>4</sub> ) <sub>2</sub>       | KLa(WO <sub>4</sub> ) <sub>2</sub>        | KY(WO <sub>4</sub> ) <sub>2</sub> | KBi(WO <sub>4</sub> ) <sub>2</sub> |
|-------------------------------------------------------------|-------------------------------------------|-------------------------------------------|-----------------------------------|------------------------------------|
| Temperature / K                                             | 298(2)                                    | 300(2)                                    | 299(2)                            | 300(2)                             |
| Molar weight / g·mol <sup>-1</sup>                          | 727.67                                    | 673.71                                    | 623.71                            | 743.78                             |
| Crystal system                                              | Tetragonal                                | Tetragonal                                | Monoclinic                        | Monoclinic                         |
| Space group                                                 | <i>I</i> <sub>4</sub> / <i>a</i> (no. 88) | <i>I</i> <sub>4</sub> / <i>a</i> (no. 88) | <i>C</i> 2/ <i>c</i> (no. 15)     | <i>C</i> 2/ <i>c</i> (no. 15)      |
| <i>a</i> / Å                                                | 5.2823(9)                                 | 5.4442(2)                                 | 10.6245(4)                        | 10.8170(4)                         |
| <i>b</i> / Å                                                | 5.2823(9)                                 | 5.4442(2)                                 | 10.3366(4)                        | 10.5611(4)                         |
| <i>c</i> / Å                                                | 11.509(2)                                 | 12.1406(6)                                | 7.5497(3)                         | 7.6045(3)                          |
| $\alpha$ / °                                                | 90                                        | 90                                        | 90                                | 90                                 |
| $\beta$ / °                                                 | 90                                        | 90                                        | 130.7421(9)                       | 130.8497(7)                        |
| $\gamma$ / °                                                | 90                                        | 90                                        | 90                                | 90                                 |
| <i>V</i> / Å <sup>3</sup>                                   | 321.12(12)                                | 359.84(3)                                 | 628.18                            | 657.13(4)                          |
| <i>Z</i>                                                    | 2                                         | 2                                         | 4                                 | 4                                  |
| $\rho$ / g·mol <sup>-1</sup>                                | 7.526                                     | 6.218                                     | 6.595                             | 7.518                              |
| Absorption coefficient<br>$\mu$ / mm <sup>-1</sup>          | 63.139                                    | 38.300                                    | 46.362                            | 62.276                             |
| <i>F</i> (000)                                              | 612                                       | 576                                       | 1080                              | 1256                               |
| Radiation; wavelength $\lambda$<br>/ Å                      |                                           |                                           | 0.71073                           |                                    |
| Diffractometer                                              |                                           |                                           | Bruker D8 Venture                 |                                    |
| $\theta$ range / °                                          | 4.245-35.978                              | 4.102-32.962                              | 3.208-34.962                      | 3.149-34.999                       |
| Absorption correction                                       |                                           |                                           | Multi-scan                        |                                    |
| Transmission (min; max)                                     | 0.4861; 0.7490                            | 0.4672; 0.7516                            | 0.6156; 0.7490                    | 0.5701; 0.7479                     |
| Index range <i>h</i>   <i>k</i>   <i>l</i>                  | -8/7   -8/8   -18/18                      | -8/8   -8/8   -18/18                      | 17/17   -16/16   -12/12           | 17/17   -16/16   -12/12            |
| Reflections collected                                       | 2286                                      | 47796                                     | 9999                              | 12151                              |
| Independent reflections                                     | 383                                       | 338                                       | 1387                              | 1450                               |
| Obs. reflections                                            | 320                                       | 335                                       | 1151                              | 1301                               |
| Refined parameter /<br>restraints                           | 16                                        | 16                                        | 57                                | 57                                 |
| <i>R</i> <sub>int</sub>                                     | 0.0317                                    | 0.0498                                    | 0.0368                            | 0.0412                             |
| <i>R</i> <sub>1</sub> (all data)                            | 0.0262                                    | 0.0290                                    | 0.0295                            | 0.0240                             |
| <i>wR</i> <sub>2</sub>                                      | 0.0355                                    | 0.0659                                    | 0.0386                            | 0.0320                             |
| GooF                                                        | 1.044                                     | 1.491                                     | 1.054                             | 1.068                              |
| Residual electron density<br>(max; min) / e Å <sup>-3</sup> | 1.552; -0.888                             | 1.190; -1.499                             | 1.753; -1.426                     | 1.835; -1.625                      |
| CSD                                                         | 2539270                                   | 2539267                                   | 2539268                           | 2539269                            |

**Table S3.** Atomic coordinates, Wyckoff symbols and isotropic displacement parameters  $U_{\text{eq}} / \text{\AA}^2$  in  $\alpha\text{-LiLa}(\text{WO}_4)_2$ . Standard deviations are given in parentheses

| Atom | Wyckoff symbol | x           | y          | z          | $U_{\text{eq}}$ |
|------|----------------|-------------|------------|------------|-----------------|
| W1   | 2i             | 0.25697(2)  | 0.79481(2) | 0.52450(2) | 0.00528(4)      |
| W2   | 2i             | 0.35611(2)  | 0.39794(2) | 0.21691(2) | 0.00520(4)      |
| La1  | 2i             | 0.81698(3)  | 0.21577(3) | 0.04478(3) | 0.00602(4)      |
| Li1  | 2i             | -0.2593(14) | 0.8194(14) | 0.4846(17) | 0.0280(19)      |
| O1   | 2i             | 0.2975(5)   | 0.4858(4)  | 0.0203(5)  | 0.0124(5)       |
| O2   | 2i             | 0.1820(4)   | 0.8650(4)  | 0.3083(4)  | 0.0103(5)       |
| O3   | 2i             | 0.0385(4)   | 0.8013(4)  | 0.5822(4)  | 0.0097(5)       |
| O4   | 2i             | 0.4394(4)   | 1.0335(4)  | 0.7473(4)  | 0.0116(5)       |
| O5   | 2i             | 0.1815(4)   | 0.1459(4)  | 0.0678(4)  | 0.0094(5)       |
| O6   | 2i             | 0.6158(4)   | 0.3317(4)  | 0.2467(4)  | 0.0087(5)       |
| O7   | 2i             | 0.1396(4)   | 0.4921(4)  | 0.3025(4)  | 0.0081(4)       |
| O8   | 2i             | 0.5159(4)   | 0.6730(4)  | 0.4896(4)  | 0.0067(4)       |

**Table S4.** Anisotropic displacement parameters  $U_{ij} / \text{\AA}^2$  in  $\alpha\text{-LiLa}(\text{WO}_4)_2$ . Standard deviations are given in parentheses

| Atom | $U_{11}$   | $U_{22}$   | $U_{33}$   | $U_{12}$   | $U_{13}$   | $U_{23}$   |
|------|------------|------------|------------|------------|------------|------------|
| W1   | 0.00576(6) | 0.00522(6) | 0.00553(6) | 0.00188(4) | 0.00306(5) | 0.00267(5) |
| W2   | 0.00485(6) | 0.00481(6) | 0.00566(6) | 0.00133(4) | 0.00228(5) | 0.00245(5) |
| La1  | 0.00585(8) | 0.00607(8) | 0.00599(8) | 0.00132(6) | 0.00294(6) | 0.00258(6) |
| Li1  | 0.018(4)   | 0.028(4)   | 0.052(6)   | 0.011(3)   | 0.023(4)   | 0.024(4)   |
| O1   | 0.0153(13) | 0.0131(13) | 0.0138(12) | 0.0067(10) | 0.0080(11) | 0.0093(11) |
| O2   | 0.0137(12) | 0.0111(12) | 0.0086(11) | 0.0049(10) | 0.006(1)   | 0.006(1)   |
| O3   | 0.0065(11) | 0.0105(12) | 0.0120(11) | 0.0023(9)  | 0.0048(9)  | 0.0047(10) |
| O4   | 0.0089(12) | 0.0087(12) | 0.0120(12) | 0.0002(9)  | 0.0037(10) | 0.0018(10) |
| O5   | 0.0076(11) | 0.0066(11) | 0.0119(12) | 0.0017(9)  | 0.0035(10) | 0.0038(9)  |
| O6   | 0.0086(11) | 0.0130(12) | 0.0101(11) | 0.0052(9)  | 0.0061(9)  | 0.0082(10) |
| O7   | 0.0063(11) | 0.0066(11) | 0.0088(11) | 0.0015(9)  | 0.0029(9)  | 0.0019(9)  |
| O8   | 0.0059(11) | 0.0069(11) | 0.0074(10) | 0.0018(9)  | 0.0037(9)  | 0.0027(9)  |

**Table S5.** Atomic coordinates, Wyckoff symbols and isotropic displacement parameters  $U_{\text{eq}} / \text{\AA}^2$  in  $\alpha\text{-LiPr}(\text{WO}_4)_2$ . Standard deviations are given in parentheses

| Atom | Wyckoff symbol | x           | y          | z          | $U_{\text{eq}}$ |
|------|----------------|-------------|------------|------------|-----------------|
| W1   | 2i             | 0.25833(2)  | 0.79567(2) | 0.52636(2) | 0.00504(3)      |
| W2   | 2i             | 0.35458(2)  | 0.39597(2) | 0.21270(2) | 0.00493(3)      |
| Pr1  | 2i             | 0.81880(2)  | 0.21613(2) | 0.04482(2) | 0.00571(3)      |
| Li1  | 2i             | -0.2613(11) | 0.8187(11) | 0.4818(15) | 0.0257(14)      |
| O1   | 2i             | 0.2940(4)   | 0.4851(3)  | 0.0151(4)  | 0.0112(3)       |
| O2   | 2i             | 0.1818(4)   | 0.8639(3)  | 0.3066(3)  | 0.0102(3)       |
| O3   | 2i             | 0.0397(3)   | 0.8028(3)  | 0.5870(4)  | 0.0099(3)       |
| O4   | 2i             | 0.4442(3)   | 1.0369(3)  | 0.7512(3)  | 0.0112(3)       |
| O5   | 2i             | 0.1799(3)   | 0.1416(3)  | 0.0630(3)  | 0.0095(3)       |
| O6   | 2i             | 0.6162(3)   | 0.3302(3)  | 0.2429(3)  | 0.0078(3)       |
| O7   | 2i             | 0.1372(3)   | 0.4899(3)  | 0.3010(3)  | 0.0078(3)       |

|    |    |           |           |           |           |
|----|----|-----------|-----------|-----------|-----------|
| O8 | 2i | 0.5156(3) | 0.6730(3) | 0.4889(3) | 0.0061(3) |
|----|----|-----------|-----------|-----------|-----------|

**Table S6.** Anisotropic displacement parameters  $U_{ij} / \text{\AA}^2$  in  $\alpha\text{-LiPr}(\text{WO}_4)_2$ . Standard deviations are given in parentheses

| Atom | $U_{11}$   | $U_{22}$   | $U_{33}$   | $U_{12}$   | $U_{13}$   | $U_{23}$   |
|------|------------|------------|------------|------------|------------|------------|
| W1   | 0.00519(5) | 0.00507(4) | 0.00543(4) | 0.00170(3) | 0.00287(3) | 0.00259(3) |
| W2   | 0.00436(4) | 0.00468(4) | 0.00543(4) | 0.00113(3) | 0.00211(3) | 0.00235(3) |
| Pr1  | 0.00527(6) | 0.00583(5) | 0.00578(5) | 0.00100(4) | 0.00265(4) | 0.00252(4) |
| Li1  | 0.016(3)   | 0.026(3)   | 0.049(4)   | 0.009(2)   | 0.019(3)   | 0.025(3)   |
| O1   | 0.0128(9)  | 0.0126(8)  | 0.0119(8)  | 0.0049(7)  | 0.0065(7)  | 0.0082(7)  |
| O2   | 0.0122(9)  | 0.0115(8)  | 0.0082(7)  | 0.0040(7)  | 0.0046(7)  | 0.0061(7)  |
| O3   | 0.0095(8)  | 0.0120(8)  | 0.0120(8)  | 0.0051(7)  | 0.0069(7)  | 0.0069(7)  |
| O4   | 0.0086(8)  | 0.0089(8)  | 0.0108(8)  | 0.0003(6)  | 0.0036(7)  | 0.0014(7)  |
| O5   | 0.0074(8)  | 0.0060(7)  | 0.0112(8)  | 0.0005(6)  | 0.0025(7)  | 0.0028(6)  |
| O6   | 0.0081(8)  | 0.0115(8)  | 0.0084(7)  | 0.0052(6)  | 0.0061(6)  | 0.0064(6)  |
| O7   | 0.0046(7)  | 0.0079(7)  | 0.0093(7)  | 0.0010(6)  | 0.0038(6)  | 0.0024(6)  |
| O8   | 0.0047(7)  | 0.0064(7)  | 0.0081(7)  | 0.0013(6)  | 0.0034(6)  | 0.0039(6)  |

**Table S7.** Atomic coordinates, Wyckoff symbols and isotropic displacement parameters  $U_{\text{eq}} / \text{\AA}^2$  in  $\alpha\text{-LiY}(\text{WO}_4)_2$ . Standard deviations are given in parentheses

| Atom | Wyckoff symbol | x          | y          | z          | $U_{\text{eq}}$ |
|------|----------------|------------|------------|------------|-----------------|
| Y1   | 2f             | 5/4        | 0.70064(9) | -1/4       | 0.00909(12)     |
| Li1  | 2e             | 5/4        | -0.261(3)  | 1/4        | 0.027(2)        |
| W1   | 4g             | 0.75229(2) | 0.81859(2) | 0.01698(2) | 0.00634(9)      |
| O1   | 4g             | 0.9087(5)  | 0.6259(5)  | 0.1360(3)  | 0.0094(5)       |
| O2   | 4g             | 1.0482(5)  | 0.8919(5)  | -0.0953(2) | 0.0093(5)       |
| O3   | 4g             | 0.6057(6)  | 0.6270(5)  | -0.1067(3) | 0.0123(5)       |
| O4   | 4g             | 0.4730(5)  | 0.9183(5)  | 0.1148(3)  | 0.0127(5)       |

**Table S8.** Anisotropic displacement parameters  $U_{ij} / \text{\AA}^2$  in  $\alpha\text{-LiY}(\text{WO}_4)_2$ . Standard deviations are given in parentheses

| Atom | $U_{11}$    | $U_{22}$    | $U_{33}$    | $U_{12}$    | $U_{13}$    | $U_{23}$   |
|------|-------------|-------------|-------------|-------------|-------------|------------|
| Y1   | 0.0126(2)   | 0.0100(2)   | 0.0050(2)   | 0.00000     | 0.00243(19) | 0.00000    |
| Li1  | 0.017(5)    | 0.045(7)    | 0.020(6)    | 0.00000     | -0.002(4)   | 0.00000    |
| W1   | 0.00658(11) | 0.00748(11) | 0.00504(11) | 0.00036(4)  | 0.00103(6)  | 0.00073(4) |
| O1   | 0.0108(12)  | 0.0092(11)  | 0.0081(12)  | 0.0003(11)  | 0.001(1)    | 0.0004(10) |
| O2   | 0.0126(12)  | 0.0081(12)  | 0.0077(11)  | -0.0002(10) | 0.0031(9)   | -0.0002(9) |
| O3   | 0.0138(13)  | 0.0142(13)  | 0.0086(12)  | -0.0024(11) | -0.0003(10) | 0.0007(11) |
| O4   | 0.0127(12)  | 0.0171(14)  | 0.0088(11)  | 0.0044(11)  | 0.0047(10)  | 0.0044(10) |

**Table S9.** Atomic coordinates, Wyckoff symbols and isotropic displacement parameters  $U_{\text{eq}} / \text{\AA}^2$  in  $\beta\text{-LiLa}(\text{WO}_4)_2$ . Standard deviations are given in parentheses

| Atom | Wyckoff symbol | S.O.F.  | x       | y   | z   | $U_{\text{eq}}$ |
|------|----------------|---------|---------|-----|-----|-----------------|
| La1  | 4a             | 0.54(2) | 0       | 1/4 | 1/8 | 0.0138(18)      |
| Li1  | 4a             | 0.46(2) | 0       | 1/4 | 1/8 | 0.0138(18)      |
| W1   | 4b             |         | 01. Feb | 1/4 | 1/8 | 0.0112(8)       |

|    |     |          |          |            |            |
|----|-----|----------|----------|------------|------------|
| O1 | 16f | 0.262(3) | 0.603(3) | 0.0404(12) | 0.0404(12) |
|----|-----|----------|----------|------------|------------|

**Table S10.** Anisotropic displacement parameters  $U_{ij} / \text{\AA}^2$  in  $\beta\text{-LiLa}(\text{WO}_4)_2$ . Standard deviations are given in parentheses

| Atom | $U_{11}$   | $U_{22}$   | $U_{33}$   | $U_{12}$  | $U_{13}$  | $U_{23}$ |
|------|------------|------------|------------|-----------|-----------|----------|
| La1  | 0.0131(19) | 0.0131(19) | 0.015(2)   | 0.00000   | 0.00000   | 0.00000  |
| Li1  | 0.0131(19) | 0.0131(19) | 0.015(2)   | 0.00000   | 0.00000   | 0.00000  |
| W1   | 0.0095(8)  | 0.0095(8)  | 0.0145(10) | 0.00000   | 0.00000   | 0.00000  |
| O1   | 0.015(6)   | 0.005(6)   | 0.017(6)   | -0.003(5) | -0.004(5) | 0.002(5) |

**Table S11.** Atomic coordinates, Wyckoff symbols and isotropic displacement parameters  $U_{\text{eq}} / \text{\AA}^2$  in  $\beta\text{-LiPr}(\text{WO}_4)_2$ . Standard deviations are given in parentheses

| Atom | Wyckoff symbol | S.O.F.   | $x$       | $y$       | $z$       | $U_{\text{eq}}$ |
|------|----------------|----------|-----------|-----------|-----------|-----------------|
| Pr1  | 4a             | 0.511(5) | 0         | 1/4       | 1/8       | 0.0112(4)       |
| Li1  | 4a             | 0.489(5) | 0         | 1/4       | 1/8       | 0.0112(4)       |
| W1   | 4b             |          | 1/2       | 3/4       | 1/8       | 0.01400(18)     |
| O1   | 16f            |          | 0.2604(8) | 0.5992(7) | 0.0400(4) | 0.0182(7)       |

**Table S12.** Anisotropic displacement parameters  $U_{ij} / \text{\AA}^2$  in  $\beta\text{-LiPr}(\text{WO}_4)_2$ . Standard deviations are given in parentheses

| Atom | $U_{11}$    | $U_{22}$    | $U_{33}$   | $U_{12}$    | $U_{13}$    | $U_{23}$   |
|------|-------------|-------------|------------|-------------|-------------|------------|
| Pr1  | 0.0115(4)   | 0.0115(4)   | 0.0104(5)  | 0.00000     | 0.00000     | 0.00000    |
| Li1  | 0.0115(4)   | 0.0115(4)   | 0.0104(5)  | 0.00000     | 0.00000     | 0.00000    |
| W1   | 0.01124(19) | 0.01124(19) | 0.0195(2)  | 0.00000     | 0.00000     | 0.00000    |
| O1   | 0.0201(17)  | 0.0146(15)  | 0.0199(15) | -0.0030(13) | -0.0046(13) | 0.0010(13) |

**Table S13.** Atomic coordinates, Wyckoff symbols and isotropic displacement parameters  $U_{\text{eq}} / \text{\AA}^2$  in  $\beta\text{-LiY}(\text{WO}_4)_2$ . Standard deviations are given in parentheses

| Atom | Wyckoff symbol | S.O.F.   | $x$        | $y$        | $z$       | $U_{\text{eq}}$ |
|------|----------------|----------|------------|------------|-----------|-----------------|
| Y1   | 4a             | 0.481(8) | 0          | 1/4        | 1/8       | 0.0081(7)       |
| Li1  | 4a             | 0.519(8) | 0          | 1/4        | 1/8       | 0.0081(7)       |
| W1   | 4b             |          | 1/2        | 3/4        | 1/8       | 0.01421(16)     |
| O1   | 16f            |          | 0.6597(10) | 0.5051(10) | 0.2108(5) | 0.2108(5)       |

**Table S14.** Anisotropic displacement parameters  $U_{ij} / \text{\AA}^2$  in  $\beta\text{-LiY}(\text{WO}_4)_2$ . Standard deviations are given in parentheses

| Atom | $U_{11}$    | $U_{22}$    | $U_{33}$   | $U_{12}$   | $U_{13}$    | $U_{23}$ |
|------|-------------|-------------|------------|------------|-------------|----------|
| Y1   | 0.0089(8)   | 0.0089(8)   | 0.0065(10) | 0.00000    | 0.00000     | 0.00000  |
| Li1  | 0.0089(8)   | 0.0089(8)   | 0.0065(10) | 0.00000    | 0.00000     | 0.00000  |
| W1   | 0.01294(18) | 0.01294(18) | 0.0167(3)  | 0.00000    | 0.00000     | 0.00000  |
| O1   | 0.018(2)    | 0.024(3)    | 0.019(2)   | 0.0042(19) | -0.0008(19) | 0.005(2) |

**Table S15.** Atomic coordinates, Wyckoff symbols and isotropic displacement parameters  $U_{eq} / \text{\AA}^2$  in  $\text{LiBi}(\text{WO}_4)_2$ . Standard deviations are given in parentheses

| Atom | Wyckoff symbol | x          | y           | z          | $U_{eq}$    |
|------|----------------|------------|-------------|------------|-------------|
| Li1  | 2e             | -1/4       | -0.253(4)   | 3/4        | 0.031(4)    |
| Bi1  | 2f             | 1/4        | 0.31915(4)  | 3/4        | 0.00891(10) |
| W1   | 4g             | 0.24923(4) | -0.17340(3) | 0.51695(2) | 0.00628(9)  |
| O1   | 4g             | 0.0881(8)  | 0.6473(6)   | 0.8660(4)  | 0.0120(7)   |
| O2   | 4g             | 0.0560(7)  | 0.1008(6)   | 0.9029(3)  | 0.0098(6)   |
| O3   | 4g             | 0.1222(8)  | -0.3626(7)  | 0.3938(4)  | 0.0145(7)   |
| O4   | 4g             | -0.0470(7) | -0.0898(7)  | 0.6088(3)  | 0.0116(7)   |

**Table S16.** Anisotropic displacement parameters  $U_{ij} / \text{\AA}^2$  in  $\text{LiBi}(\text{WO}_4)_2$ . Standard deviations are given in parentheses

| Atom | $U_{11}$    | $U_{22}$    | $U_{33}$    | $U_{12}$   | $U_{13}$    | $U_{23}$    |
|------|-------------|-------------|-------------|------------|-------------|-------------|
| Li1  | 0.024(8)    | 0.047(11)   | 0.024(8)    | 0.00000    | 0.021(7)    | 0.00000     |
| Bi1  | 0.01219(16) | 0.00741(15) | 0.00712(13) | 0.00000    | 0.00009(9)  | 0.00000     |
| W1   | 0.00599(13) | 0.00653(13) | 0.00629(12) | 0.00030(6) | -0.00039(7) | 0.00063(6)  |
| O1   | 0.0116(17)  | 0.0106(17)  | 0.0136(16)  | 0.0003(13) | -0.0014(13) | -0.0011(13) |
| O2   | 0.0094(16)  | 0.0103(16)  | 0.0098(14)  | 0.0017(13) | 0.0028(12)  | 0.0029(12)  |
| O3   | 0.0152(18)  | 0.0128(17)  | 0.0151(16)  | 0.0008(14) | -0.0032(14) | -0.0013(14) |
| O4   | 0.0098(16)  | 0.0166(18)  | 0.0085(14)  | 0.0036(14) | 0.0016(12)  | 0.0049(13)  |

**Table S17.** Atomic coordinates, Wyckoff symbols and isotropic displacement parameters  $U_{eq} / \text{\AA}^2$  in  $\text{NaY}(\text{WO}_4)_2$ . Standard deviations are given in parentheses

| Atom | Wyckoff symbol | S.O.F.    | x         | y         | z         | $U_{eq}$    |
|------|----------------|-----------|-----------|-----------|-----------|-------------|
| Y1   | 4b             | 0.455(11) | 1/2       | 3/4       | 1/8       | 0.0059(6)   |
| Na1  | 4b             | 0.545(11) | 1/2       | 3/4       | 1/8       | 0.0059(6)   |
| O1   | 16f            |           | 0.2426(6) | 0.4062(5) | 0.0393(3) | 0.0393(3)   |
| W1   | 4a             |           | 0         | 1/4       | 1/8       | 0.00888(17) |

**Table S18.** Anisotropic displacement parameters  $U_{ij} / \text{\AA}^2$  in  $\text{NaY}(\text{WO}_4)_2$ . Standard deviations are given in parentheses

| Atom | $U_{11}$    | $U_{22}$    | $U_{33}$   | $U_{12}$    | $U_{13}$   | $U_{23}$   |
|------|-------------|-------------|------------|-------------|------------|------------|
| Y1   | 0.0059(6)   | 0.0059(6)   | 0.0058(7)  | 0.00000     | 0.00000    | 0.00000    |
| Na1  | 0.0059(6)   | 0.0059(6)   | 0.0058(7)  | 0.00000     | 0.00000    | 0.00000    |
| O1   | 0.0211(13)  | 0.0138(12)  | 0.0165(11) | -0.0031(10) | 0.0057(10) | 0.0008(10) |
| W1   | 0.00758(17) | 0.00758(17) | 0.0115(2)  | 0.00000     | 0.00000    | 0.00000    |

**Table S19.** Atomic coordinates, Wyckoff symbols and isotropic displacement parameters  $U_{eq} / \text{\AA}^2$  in  $\text{NaBi}(\text{WO}_4)_2$ . Standard deviations are given in parentheses

| Atom | Wyckoff symbol | S.O.F.   | x   | y   | z   | $U_{eq}$  |
|------|----------------|----------|-----|-----|-----|-----------|
| Na1  | 4b             | 0.496(2) | 1/2 | 3/4 | 1/8 | 0.0147(2) |
| Bi1  | 4b             | 0.504(2) | 1/2 | 3/4 | 1/8 | 0.0147(2) |

|    |     |           |           |           |             |
|----|-----|-----------|-----------|-----------|-------------|
| W1 | 4a  | 0         | 1/4       | 1/8       | 0.01074(11) |
| O1 | 16f | 1.3480(5) | 0.4891(5) | 0.2909(2) | 0.0185(5)   |

**Table S20.** Anisotropic displacement parameters  $U_{ij} / \text{\AA}^2$  in  $\text{NaBi}(\text{WO}_4)_2$ . Standard deviations are given in parentheses

| Atom | $U_{11}$    | $U_{22}$    | $U_{33}$    | $U_{12}$  | $U_{13}$  | $U_{23}$  |
|------|-------------|-------------|-------------|-----------|-----------|-----------|
| Na1  | 0.0127(2)   | 0.0127(2)   | 0.0188(2)   | 0.00000   | 0.00000   | 0.00000   |
| Bi1  | 0.0127(2)   | 0.0127(2)   | 0.0188(2)   | 0.00000   | 0.00000   | 0.00000   |
| W1   | 0.00908(12) | 0.00908(12) | 0.01406(14) | 0.00000   | 0.00000   | 0.00000   |
| O1   | 0.0143(12)  | 0.0235(13)  | 0.0178(10)  | 0.0032(9) | 0.0012(9) | 0.0055(9) |

**Table S21.** Atomic coordinates, Wyckoff symbols and isotropic displacement parameters  $U_{\text{eq}} / \text{\AA}^2$  in  $\text{KLa}(\text{WO}_4)_2$ . Standard deviations are given in parentheses

| Atom | Wyckoff symbol | S.O.F.    | x          | y          | z         | $U_{\text{eq}}$ |
|------|----------------|-----------|------------|------------|-----------|-----------------|
| K1   | 4a             | 0.541(10) | 0          | 1/4        | 1/8       | 0.0062(5)       |
| La1  | 4a             | 0.459(10) | 0          | 1/4        | 1/8       | 0.0062(5)       |
| W1   | 4b             |           | 1/2        | 3/4        | 1/8       | 0.0111(3)       |
| O1   | 16f            |           | 0.2625(13) | 0.6142(12) | 0.0452(6) | 0.0249(13)      |

**Table S22.** Anisotropic displacement parameters  $U_{ij} / \text{\AA}^2$  in  $\text{KLa}(\text{WO}_4)_2$ . Standard deviations are given in parentheses

| Atom | $U_{11}$  | $U_{22}$  | $U_{33}$  | $U_{12}$  | $U_{13}$  | $U_{23}$  |
|------|-----------|-----------|-----------|-----------|-----------|-----------|
| K1   | 0.0071(5) | 0.0071(5) | 0.0046(6) | 0.00000   | 0.00000   | 0.00000   |
| La1  | 0.0071(5) | 0.0071(5) | 0.0046(6) | 0.00000   | 0.00000   | 0.00000   |
| W1   | 0.0094(3) | 0.0094(3) | 0.0146(3) | 0.00000   | 0.00000   | 0.00000   |
| O1   | 0.032(3)  | 0.015(2)  | 0.027(3)  | -0.004(2) | -0.015(3) | -0.003(2) |

**Table S23.** Atomic coordinates, Wyckoff symbols and isotropic displacement parameters  $U_{\text{eq}} / \text{\AA}^2$  in  $\text{KY}(\text{WO}_4)_2$ . Standard deviations are given in parentheses

| Atom | Wyckoff symbol | x          | y           | z          | $U_{\text{eq}}$ |
|------|----------------|------------|-------------|------------|-----------------|
| W1   | 8f             | 0.19614(2) | 0.00015(2)  | 0.23585(2) | 0.00478(5)      |
| Y1   | 4e             | 0          | -0.27157(5) | 1/4        | 0.00547(9)      |
| K1   | 4e             | 0          | 0.30036(13) | 1/4        | 0.0153(2)       |
| O1   | 8f             | 0.0236(3)  | 0.1082(3)   | -0.0307(5) | 0.0071(5)       |
| O2   | 8f             | 0.2754(3)  | -0.1581(2)  | 0.3749(5)  | 0.0085(5)       |
| O4   | 8f             | 0.3741(3)  | 0.0803(3)   | 0.3116(5)  | 0.0085(5)       |
| O3   | 8f             | 0.1901(3)  | 0.0759(3)   | 0.4417(5)  | 0.0084(5)       |

**Table S24.** Anisotropic displacement parameters  $U_{ij} / \text{\AA}^2$  in  $\text{KY}(\text{WO}_4)_2$ . Standard deviations are given in parentheses

| Atom | $U_{11}$   | $U_{22}$    | $U_{33}$   | $U_{12}$    | $U_{13}$    | $U_{23}$   |
|------|------------|-------------|------------|-------------|-------------|------------|
| W1   | 0.00451(6) | 0.00455(7)  | 0.00456(6) | -0.00014(5) | 0.00264(5)  | 0.00058(5) |
| Y1   | 0.0069(2)  | 0.00402(18) | 0.0055(2)  | 0.00000     | 0.00406(18) | 0.00000    |
| K1   | 0.0146(6)  | 0.0145(6)   | 0.0147(6)  | 0.00000     | 0.0086(5)   | 0.00000    |
| O1   | 0.0055(11) | 0.0059(11)  | 0.0081(12) | 0.0000(8)   | 0.0037(10)  | 0.0014(9)  |

|    |            |            |            |             |            |            |
|----|------------|------------|------------|-------------|------------|------------|
| O2 | 0.0096(12) | 0.0071(11) | 0.0057(12) | 0.0011(9)   | 0.0037(10) | 0.0016(9)  |
| O4 | 0.0084(12) | 0.0098(12) | 0.0079(12) | -0.0005(10) | 0.0056(11) | 0.0018(10) |
| O3 | 0.0086(12) | 0.0083(12) | 0.0090(12) | -0.0017(9)  | 0.0062(11) | 0.0009(9)  |

**Table S25.** Atomic coordinates, Wyckoff symbols and isotropic displacement parameters  $U_{\text{eq}} / \text{\AA}^2$  in  $\text{KBi}(\text{WO}_4)_2$ . Standard deviations are given in parentheses

| Atom | Wyckoff symbol | x          | y           | z          | $U_{\text{eq}}$ |
|------|----------------|------------|-------------|------------|-----------------|
| Bi1  | 4e             | 0          | 0.27356(2)  | 1/4        | 0.00974(5)      |
| W1   | 8f             | 0.19434(2) | 0.00020(2)  | 0.23411(2) | 0.00612(4)      |
| K1   | 4e             | 0          | 0.29746(13) | -1/4       | 0.0195(3)       |
| O1   | 8f             | 0.3114(3)  | 0.5696(2)   | 0.5589(5)  | 0.0113(5)       |
| O2   | 8f             | 0.0229(3)  | -0.1067(2)  | -0.0254(4) | 0.0086(5)       |
| O3   | 8f             | 0.2726(3)  | 0.1569(2)   | 0.3648(5)  | 0.0129(5)       |
| O4   | 8f             | 0.3702(3)  | -0.0790(3)  | 0.3142(5)  | 0.0132(5)       |

**Table S26.** Anisotropic displacement parameters  $U_{ij} / \text{\AA}^2$  in  $\text{KBi}(\text{WO}_4)_2$ . Standard deviations are given in parentheses

| Atom | $U_{11}$   | $U_{22}$   | $U_{33}$   | $U_{12}$   | $U_{13}$   | $U_{23}$    |
|------|------------|------------|------------|------------|------------|-------------|
| Bi1  | 0.01371(9) | 0.00718(8) | 0.01020(9) | 0.00000    | 0.00864(7) | 0.00000     |
| W1   | 0.00647(6) | 0.00572(6) | 0.00584(6) | 0.00023(4) | 0.00387(5) | -0.00072(4) |
| K1   | 0.0195(6)  | 0.0189(6)  | 0.0179(6)  | 0.00000    | 0.0112(5)  | 0.00000     |
| O1   | 0.0134(12) | 0.0113(12) | 0.0115(12) | -0.0001(9) | 0.0091(10) | 0.0008(9)   |
| O2   | 0.0088(11) | 0.0079(11) | 0.0087(12) | 0.0008(8)  | 0.0055(10) | -0.0011(9)  |
| O3   | 0.0131(12) | 0.0091(12) | 0.0101(13) | -0.0011(9) | 0.0048(11) | -0.0027(9)  |
| O4   | 0.0113(12) | 0.0157(13) | 0.0131(13) | 0.0030(9)  | 0.0082(11) | -0.0011(10) |

## Powder X-ray Diffraction Patterns

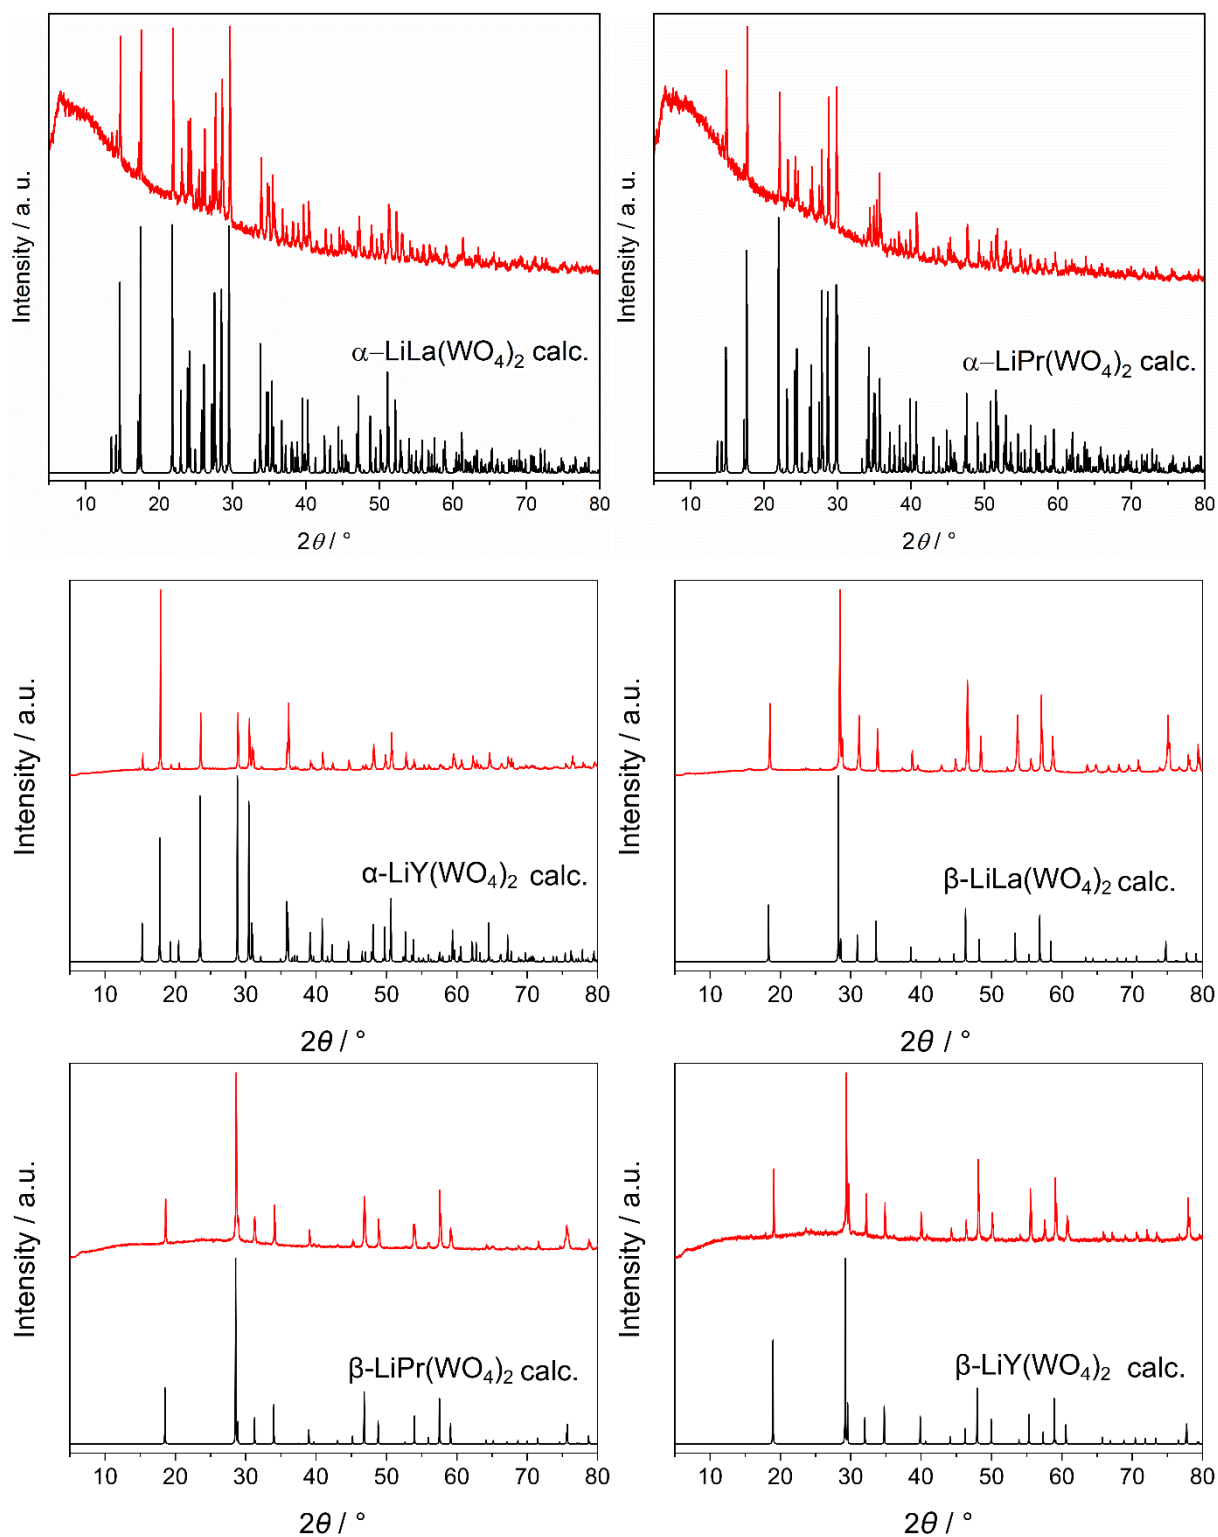

**Figure S1.** Powder diffraction data of respective double tungstates compared to the calculated patterns out of single crystal X-ray diffraction measurements.

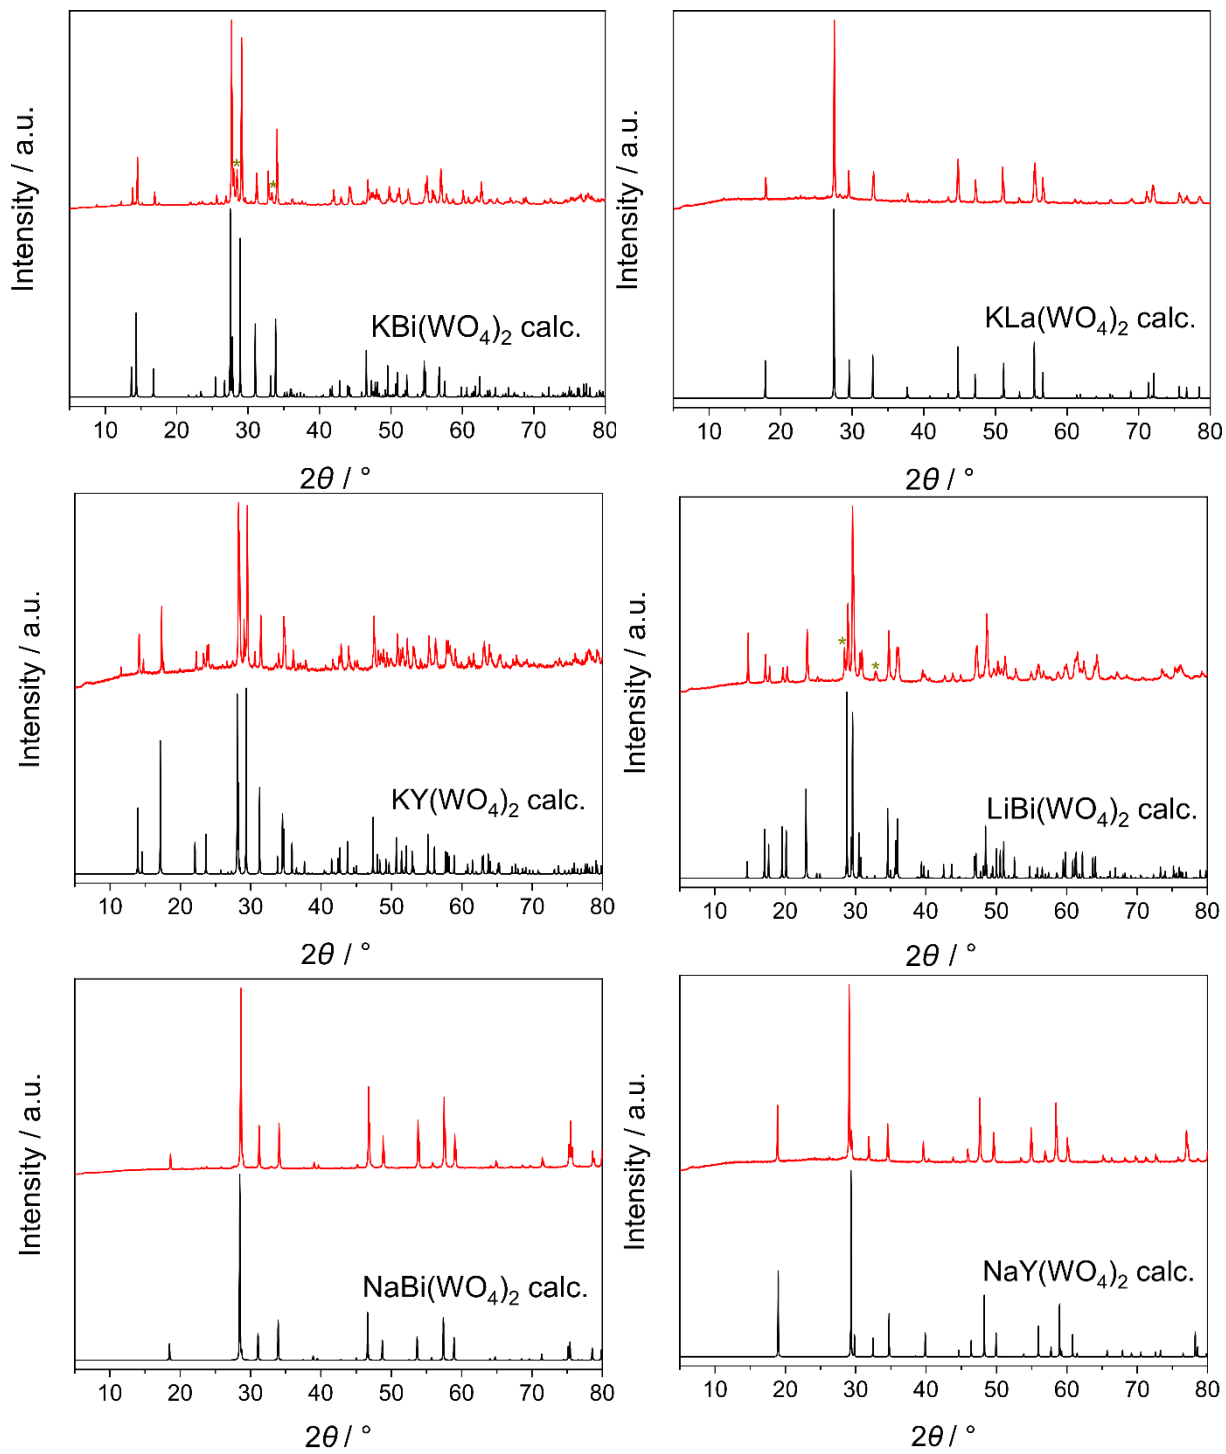

**Figure S2.** Powder diffraction data of respective double tungstates compared to the calculated patterns out of single crystal X-ray diffraction measurements.

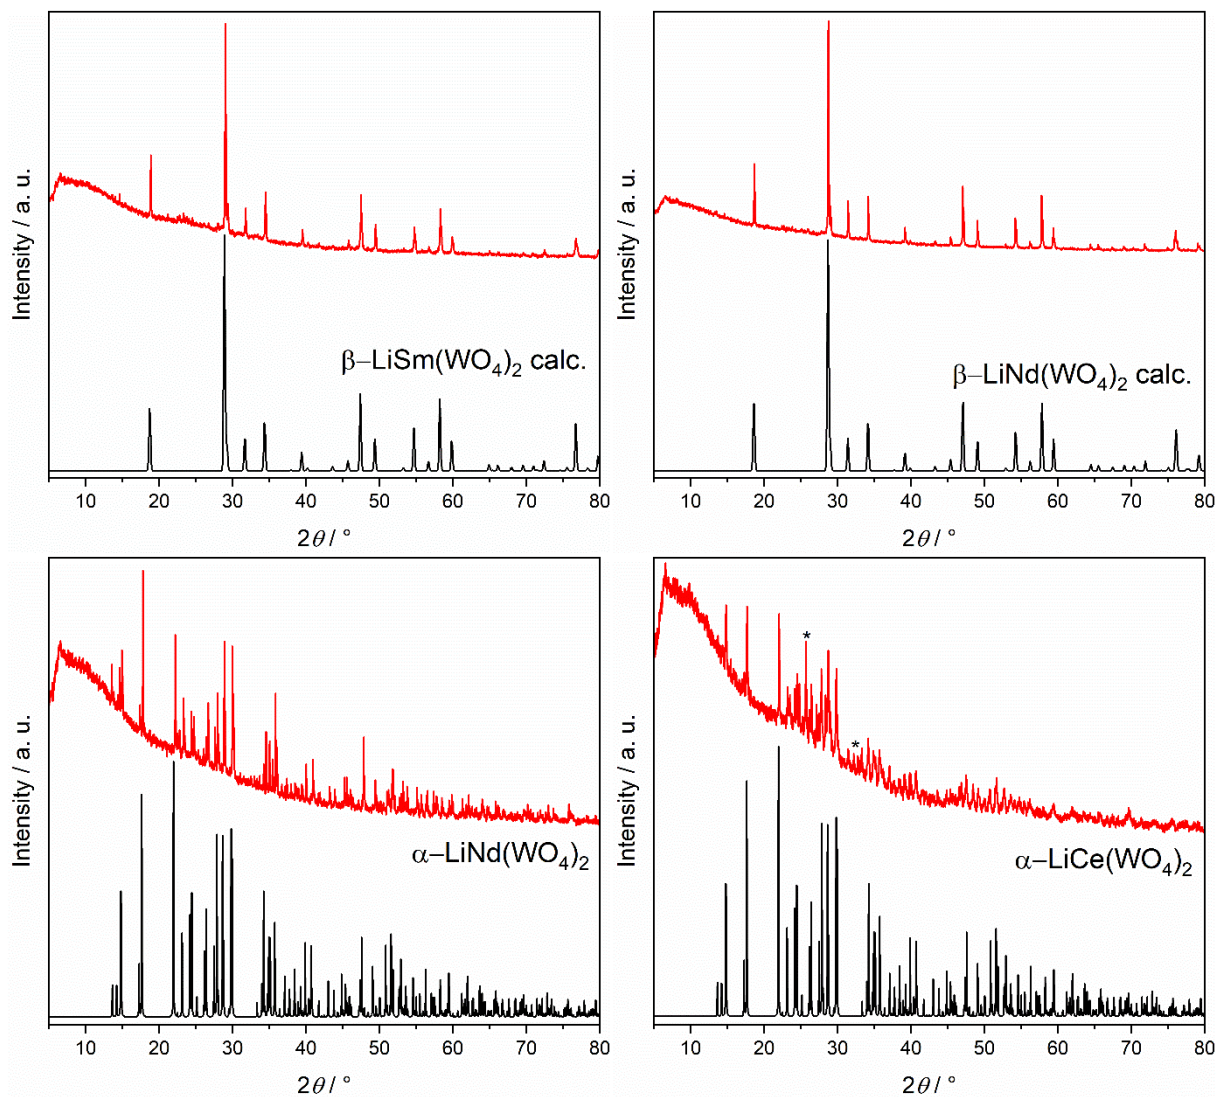

**Figure S3.** Powder diffraction data of respective double tungstates compared to the calculated patterns out of single crystal X-ray diffraction measurements.

## UV-Vis and Photoluminescence Spectra

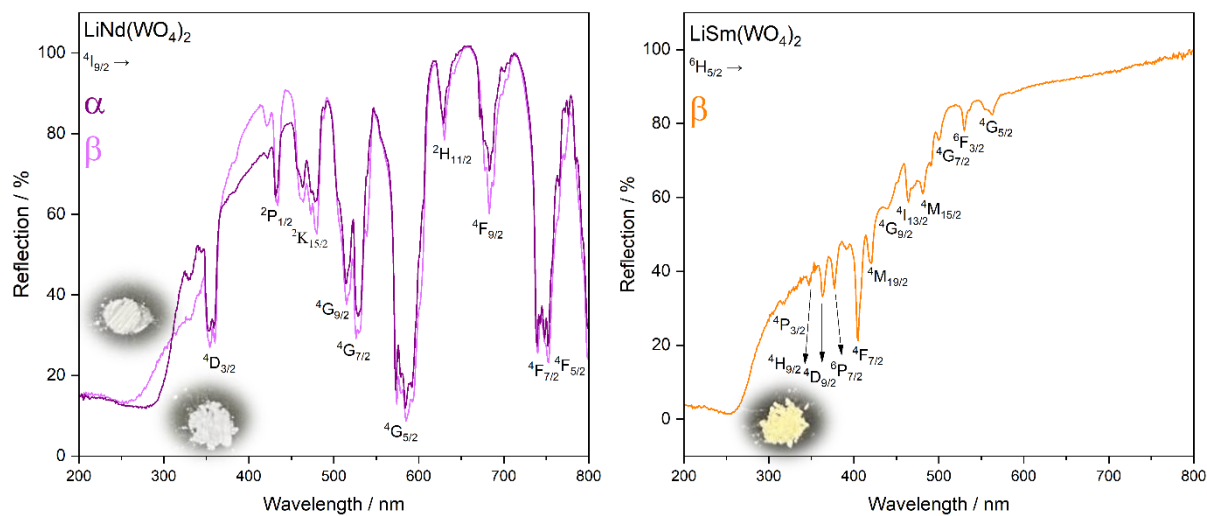

Figure S4. UV-vis spectra of respective double tungstates  $\text{LiNd}(\text{WO}_4)_2$  and  $\beta\text{-LiSm}(\text{WO}_4)_2$ .

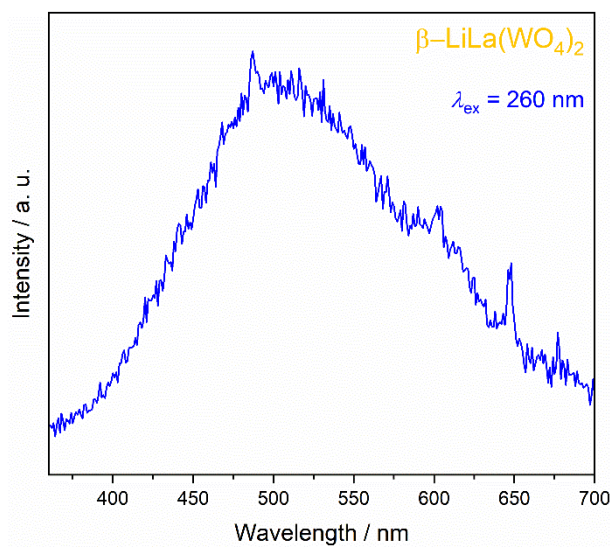

Figure S5. Emission spectrum of  $\beta\text{-LiLa}(\text{WO}_4)_2$ .

## Thermal Analysis

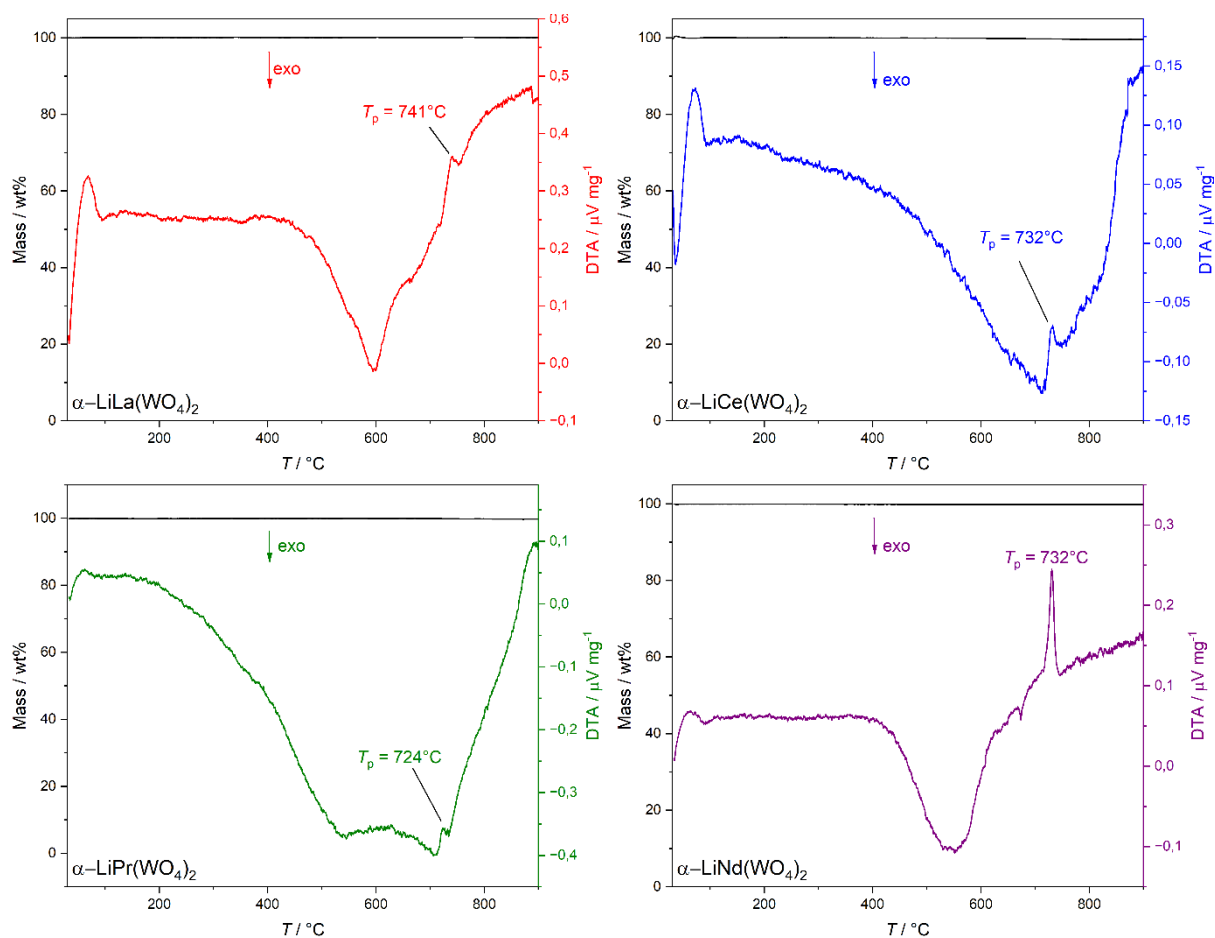

Figure S6. Thermogravimetric measurements of the low-temperature phases  $\alpha\text{-LiM}(\text{WO}_4)_2$ .

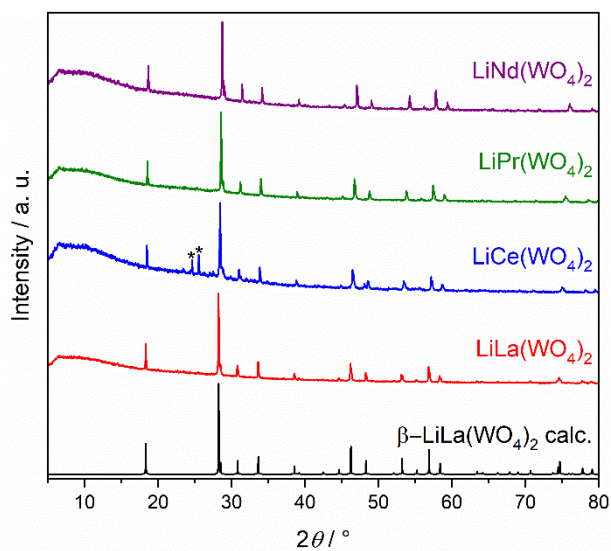

Figure S7. Powder diffraction measurements after thermogravimetric analysis of  $\alpha\text{-LiM}(\text{WO}_4)_2$ .

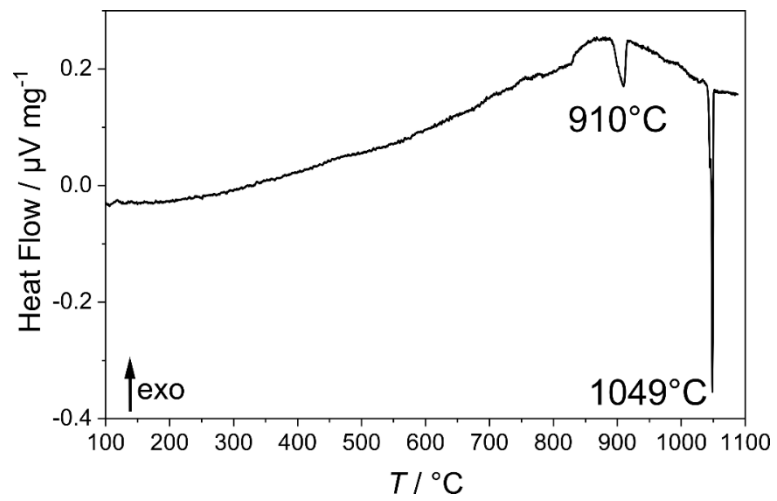

**Figure S8.** Differential Scanning Calorimetry measurement of  $\alpha\text{-LiY(WO}_4)_2$ .

## Selected Ionic Radii after Shannon

**Table S27.** Ionic radii / pm after Shannon<sup>[1]</sup> with respect to their coordination number

| Ion | Charge | Coordination | Ionic radius / pm |
|-----|--------|--------------|-------------------|
| Li  | 1      | IV           | 59                |
| Li  | 1      | VIII         | 92                |
| Na  | 1      | VIII         | 118               |
| K   | 1      | VIII         | 151               |
| K   | 1      | X            | 159               |
| La  | 3      | VIII         | 116               |
| Bi  | 3      | VIII         | 117               |
| W   | 6      | IV           | 42                |
| W   | 6      | VI           | 60                |
| O   | -2     | II           | 135               |
| O   | -2     | III          | 136               |
| O   | -2     | IV           | 138               |

**Table S28.** Ratio of the cationic radii A = Li, Na, K and M = Bi, La, Ce, Pr, Nd, Sm, Y in the double tungstates. The radii were adjusted to the respective coordination number of the structure types

| A/M                     | Bi <sup>3+</sup> | La <sup>3+</sup> | Ce <sup>3+</sup> | Pr <sup>3+</sup> | Nd <sup>3+</sup> | Sm <sup>3+</sup> | Y <sup>3+</sup> |
|-------------------------|------------------|------------------|------------------|------------------|------------------|------------------|-----------------|
| Li <sup>+</sup> α-phase | -                | 0.51             | 0.52             | 0.52             | 0.53             | 0.55             | 0.58            |
| Li <sup>+</sup> β-phase | 0.50             | 0.79             | 0.80             | 0.82             | 0.83             | 0.85             | 0.90            |
| Na <sup>+</sup>         | 1.01             | 1.02             | 1.03             | 1.05             | 1.06             | 1.09             | 1.16            |
| K <sup>+</sup>          | 1.36             | 1.30             | 1.32             | 1.34             | 1.36             | 1.47             | 1.56            |

## MAPLE Calculations

Table S29. Calculated MAPLE values of the binary and tertiary compounds

| Compound                        | MAPLE Value in kJ mol <sup>-1</sup> |
|---------------------------------|-------------------------------------|
| Li <sub>2</sub> O               | 3506 <sup>[2]</sup>                 |
| Li <sub>2</sub> WO <sub>4</sub> | 28712 <sup>[3]</sup>                |
| Na <sub>2</sub> O               | 2907 <sup>[4]</sup>                 |
| K <sub>2</sub> O                | 2511 <sup>[5]</sup>                 |
| La <sub>2</sub> O <sub>3</sub>  | 9397 <sup>[6]</sup>                 |
| Pr <sub>2</sub> O <sub>3</sub>  | 14418 <sup>[7]</sup>                |
| Y <sub>2</sub> O <sub>3</sub>   | 15270 <sup>[8]</sup>                |
| Bi <sub>2</sub> O <sub>3</sub>  | 14380 <sup>[9]</sup>                |
| WO <sub>3</sub>                 | 25945 <sup>[10]</sup>               |

## References

- [1] R. D. Shannon, *Acta Cryst. A* **1976**, *32*, 751.
- [2] T. W. D. Farley, W. Hayes, S. Hull, M. T. Hutchings, M. Vrtis, *J. Phys. Condens. Matter* **1991**, *3*, 4761.
- [3] H. Horiuchi, N. Morimoto, S. Yamaoka, *J. Solid State Chem.* **1980**, *33*, 115.
- [4] E. Zintl, A. Harder, B. Dauth, *Z. Elektrochem, Angew. Phys. Chem.* **1934**, *40*, 588.
- [5] P. Touzain, F. Brisse, M. Caillet, *Can. J. Chem.* **1970**, *48*, 3358.
- [6] W. Zachariasen, *Z. Phys. Chem.* **1926**, *1*, 134.
- [7] H. C. R. Wolf, R. Hoppe, *Z. anorg. allg. Chem.* **1985**, *529*, 61.
- [8] M. G. Paton, E. N. Maslen, *Acta Cryst.* **1965**, *19*, 307.
- [9] S. Hull, S. T. Norberg, M. G. Tucker, S. G. Eriksson, C. E. Mohn, S. Stølen, *Dalton Trans.* **2009**, *0*, 8737.
- [10] A. Aird, M. C. Domeneghetti, F. Mazzi, V. Tazzoli, E. K. H. Salje, *J. Condens. Matter Phys.* **1998**, *10*, L569-L574.
